# Supplementary material for: Ultra-high SERS detection of consumable coloring agents using plasmonic gold nanostars with high aspect-ratio spikes
Source: Royal Society of Chemistry journal article supplement (doi:10.1039/d2an00794k), 2022-01-01
Supplement: d2an00794k1.pdf [file d2an00794k1.pdf]

# Ultra-high SERS Detection of Consumable Coloring Agents Using Plasmonic Gold Nanostars with High Aspect-ratio Spikes

*Supriya Atta, <sup>a, b</sup> Tongchatra Watcharawittayakul, <sup>a, b</sup> Tuan Vo-Dinh <sup>a, b, c \*</sup>*

<sup>a</sup> Fitzpatrick Institute for Photonics, <sup>b</sup> Department of Biomedical Engineering, <sup>c</sup> Department of Chemistry, Duke University, Durham, NC 27708, USA

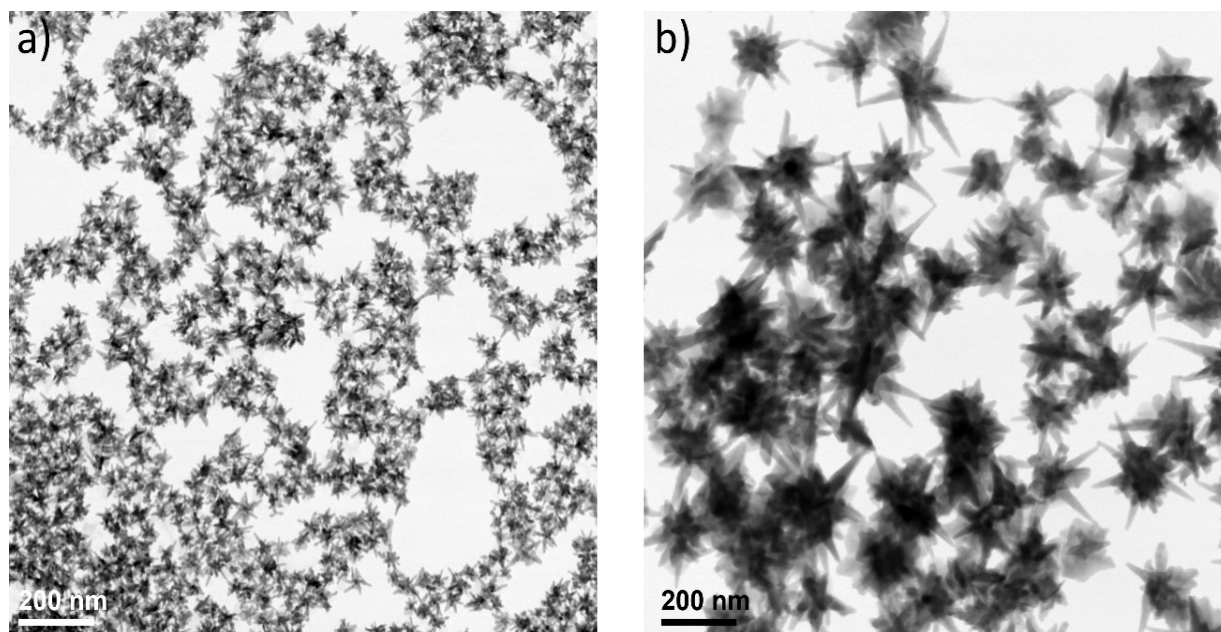

**Figure S1.** TEM image of GNS-2 (a). TEM image of GNS-4 (b).

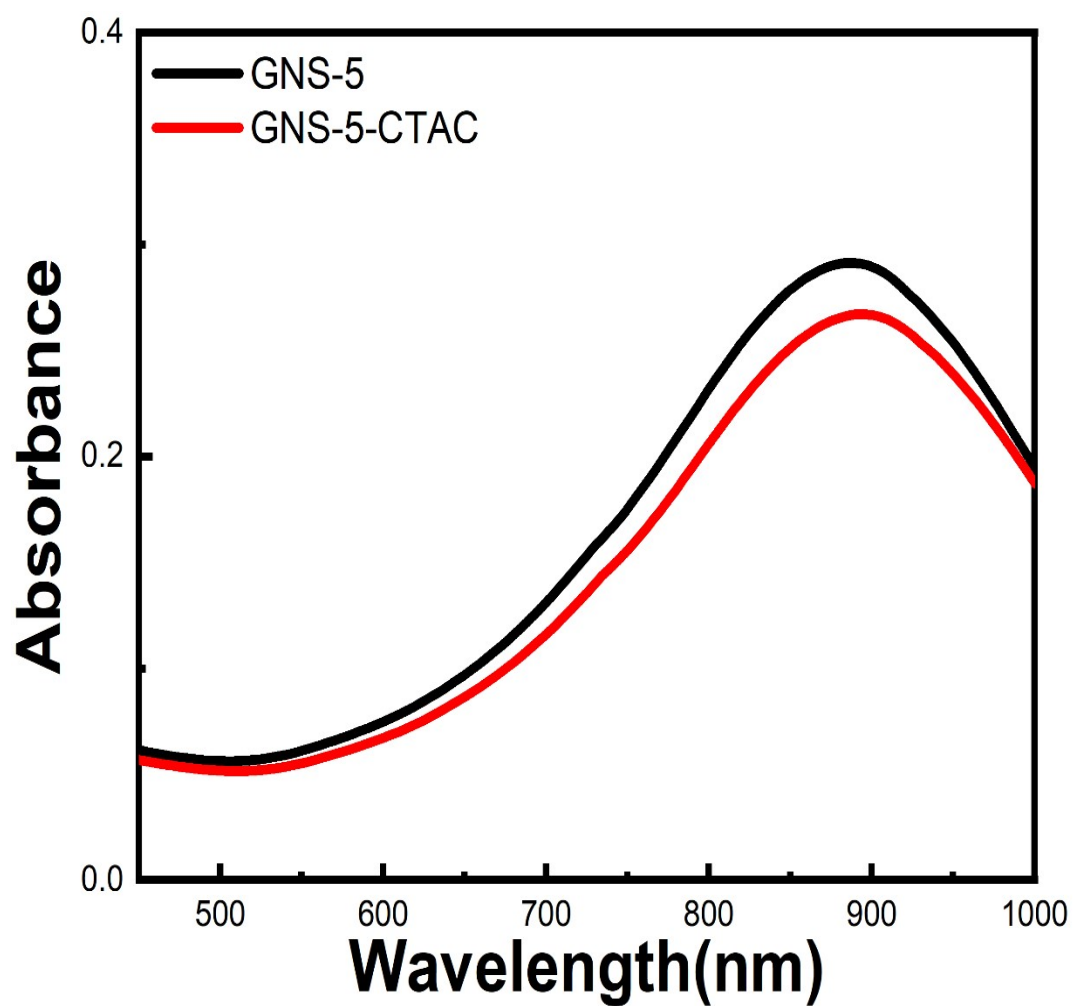

**Figure S2.** UV-Vis absorbance spectra of surfactant-free GNS-5 (black) and CTAC capped GNS-5 (red).

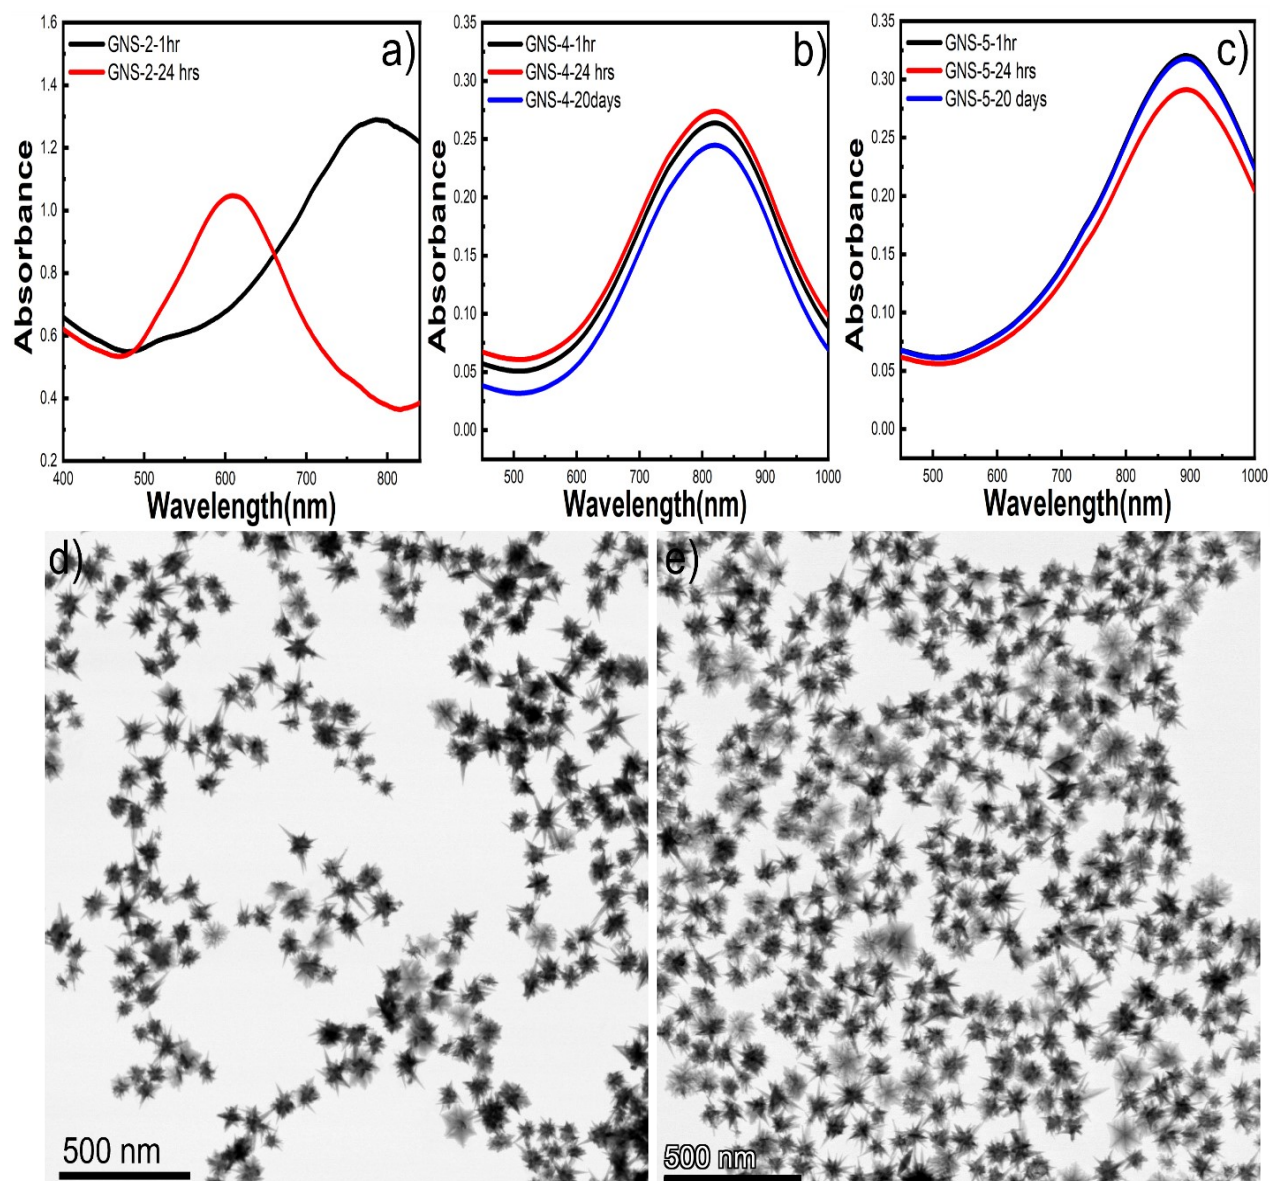

**Figure S3.** UV-Vis absorbance spectra of GNS-2 which shows that the plasmon resonance was blue shifted from 780 nm to 610 nm after 24 hours (a). UV-Vis absorbance spectra of GNS-4 which shows that the plasmon resonance remained constant at 820 nm after 20 days of synthesis (b). UV-Vis absorbance spectra of GNS-5 which shows that the plasmon resonance remained constant at 890 nm after 20 days of synthesis (c). TEM images of CTAC capped GNS-4 and GNS-5 after 20 days which further confirms that the morphology remains same after 20 days of synthesis (d-e).

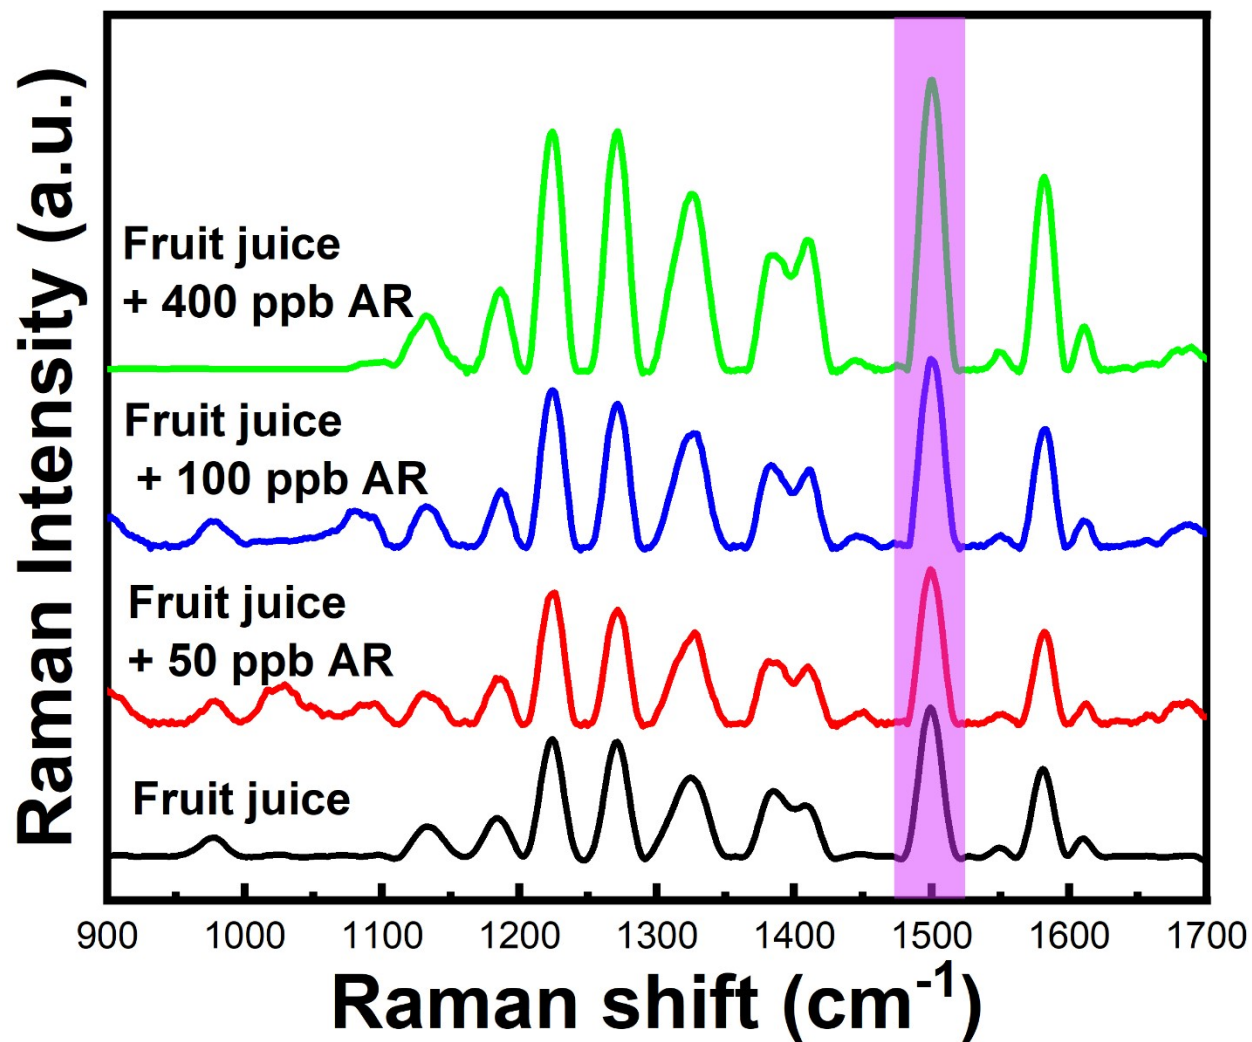

**Figure S4.** Representative SERS spectra of fruit juice sample where GNS-5 was utilized as a SERS probe and a various concentration of AR (50, 100, and 400 ppb) were added to the solution mixture.
